# Supplementary material for: Coastal Vulnerability Assessment for Future Sea Level Rise and a Comparative Study of Two Pocket Beaches in Seasonal Scale, Ios Island, Cyclades, Greece
Source: MDPI journal article supplement (doi:10.3390/jmse10111673), 2022-11-06
Supplement: s1 [file s1]

## Supplementary Materials

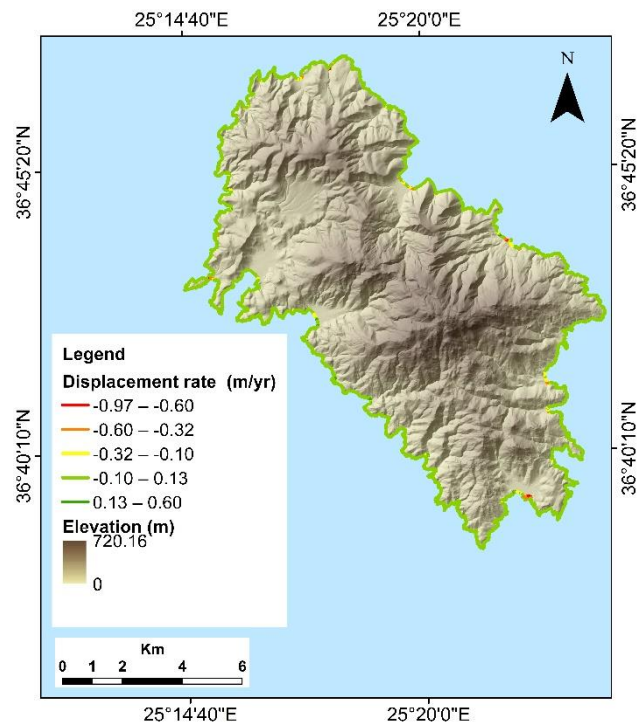

**Figure S1.** Map of the calculated shoreline displacement rate between the years 1996 and 2010 using the DSAS tool.

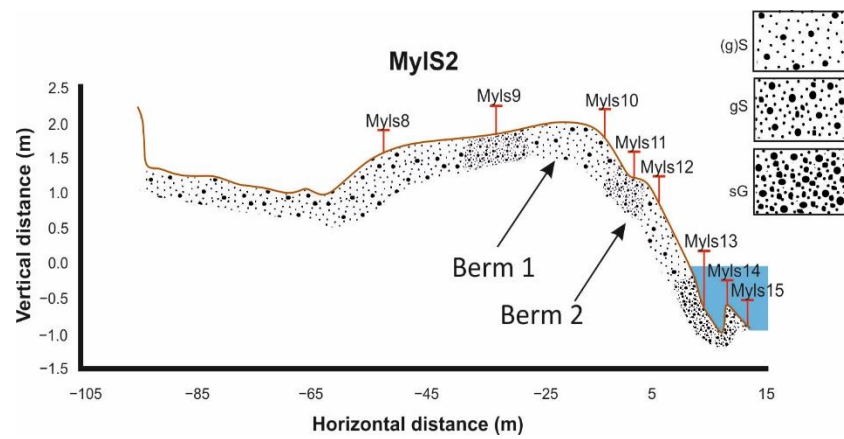

(a)

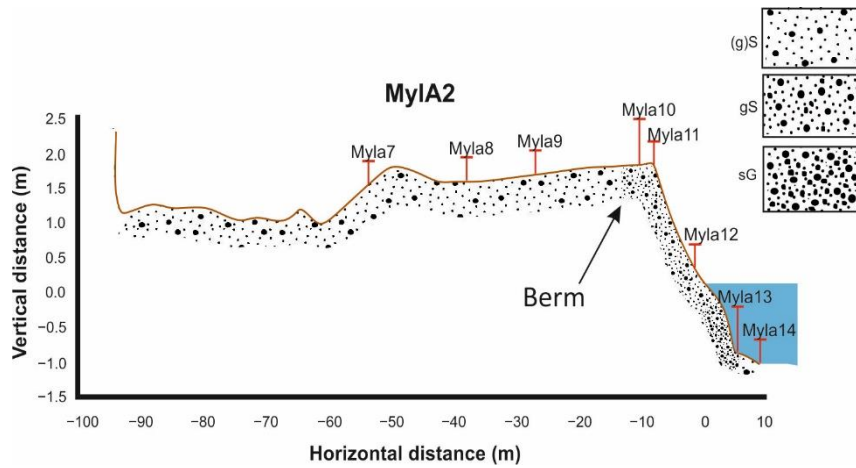

(b)

**Figure S2.:** Cross sections of the central part of Mylopotas Beach: (a) Cross section MylS2 is represented by the samples Myls8, Myls9, Myls10, Myls11, Myls12, Myls13, Myls14 and Myls15. Beach material is characterized by alternations between slightly gravelly sand (g)S, gravelly sand (gS) and sandy gravel (sG). Two berm zones have been identified during the fieldwork. (b) Cross section MylA2 is represented by the samples Myla7, Myla8, Myla9, Myla10, Myla11, Myla12, Myla13 and Myla14. Beach material is characterized by slightly gravelly sand (g)S which grades into and gravelly sand (gS) and sandy gravel (sG). Only the first berm zone has been preserved from the spring to autumn study period.

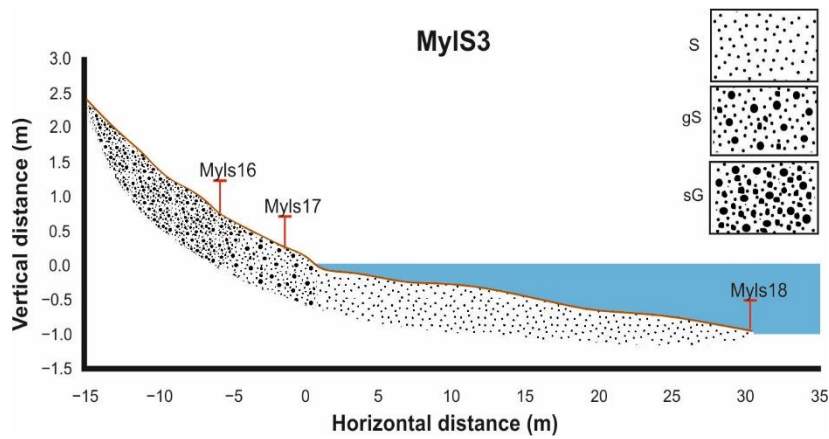

(a)

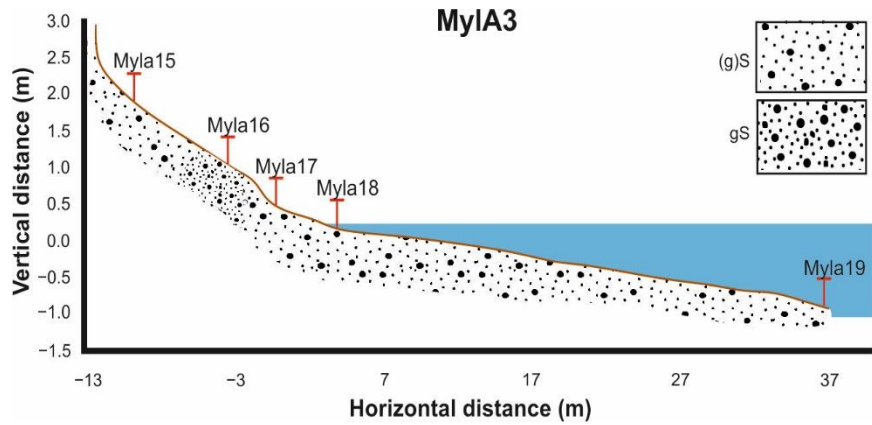

(b)

**Figure S3.:** Cross sections of the southern part of Mylopotas Beach: (a) Cross section MylS3 is represented by the samples Myls16, Myls17 and Myls18. Beach material is characterized by alternations between sandy gravel (sG), gravelly sand (gS) and sand (S). (b) Cross section MylA3 is represented by the samples Myla15, Myla16, Myla17, Myla18 and Myla19. Beach material is characterized mostly by slightly gravelly sand(g)S with a small appearance of gravelly sand (gS).

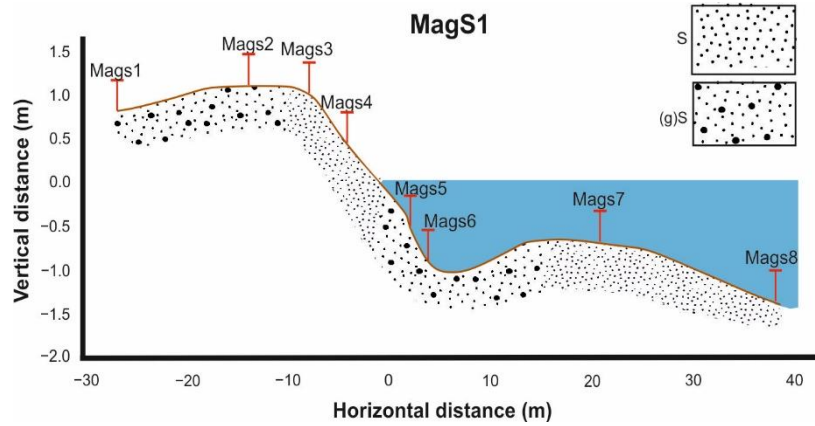

(a)

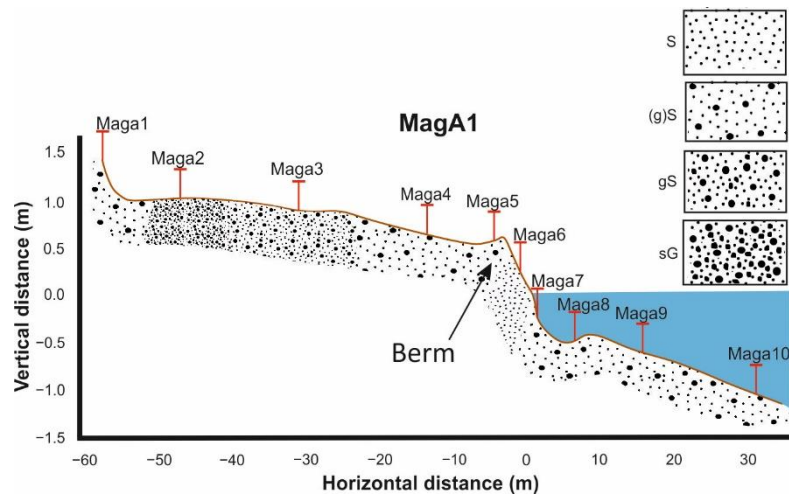

(b)

**Figure S4.:** Cross sections of the eastern bay of Magganari Beach: (a) Cross section MagS1 is represented by the samples Mags1, Mags2, Mags3, Mags4, Mags5, Mags6, Mags7 and Mags8. Beach material is characterized by alternations between slightly gravelly sand (g)S and sand (S). (b) Cross section MagA1 is represented by the samples Maga1, Maga2, Maga3, Maga4, Maga5, Maga6, Maga7, Maga8, Maga9 and Maga10. Beach material is characterized by alternations between sand (S), slightly gravelly sand (g)S, gravelly sand (gS) and sandy gravel (sG). The berm zone appears in both study periods.

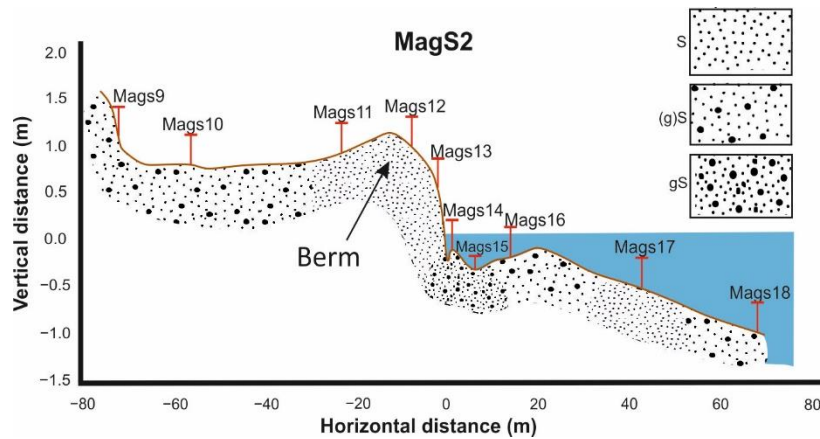

(a)

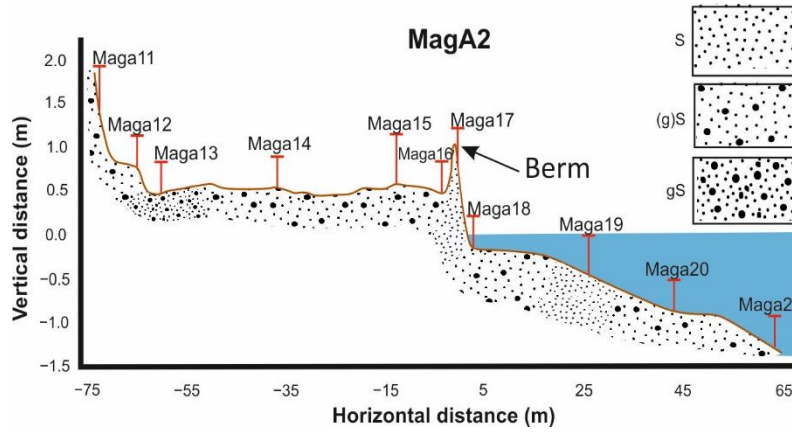

(b)

**Figure S5.:** Cross sections of the western bay of Magganari Beach: (a) Cross section MagS2 is represented by the samples Mags9, Mags10, Mags11, Mags12, Mags13, Mags14, Mags15, Mags16, Mags17 and Mags18. Beach material is characterized by alternations between slightly gravelly sand (g)S, gravelly sand (gS) and sand (S). (b) Cross section MagA2 is represented by the samples Maga11, Maga12, Maga13, Maga14, Maga15, Maga16, Maga17, Maga18, Maga19, Maga20 , and Maga21. Beach material is also characterized by alternations between slightly gravelly sand (g)S, gravelly sand (gS) and sand (S). The berm zone appears in both study periods.

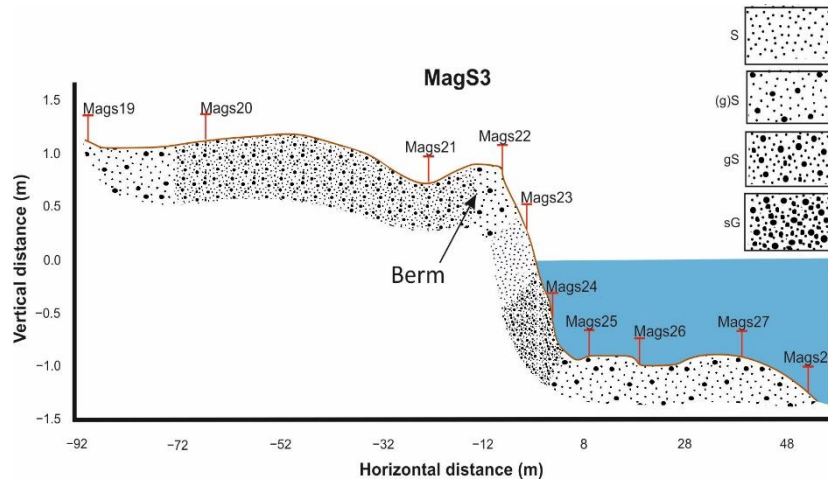

(a)

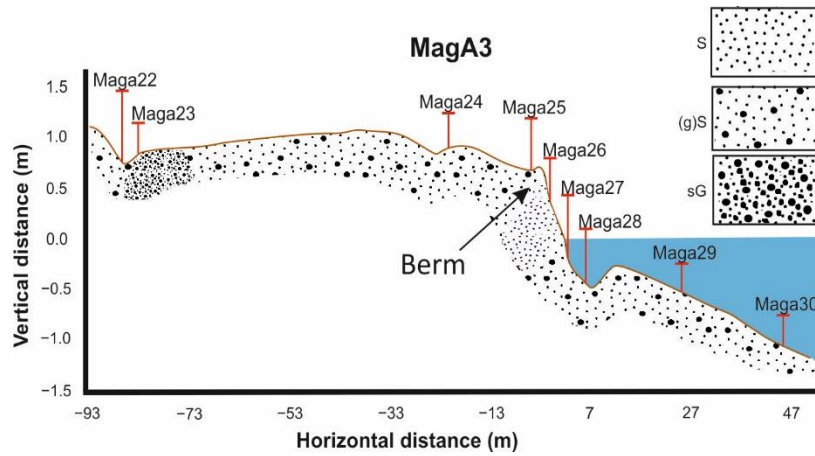

(b)

**Figure S6.:** Cross sections of the western bay of Magganari Beach:  
 (a) Cross section MagS3 is represented by the samples Mags19, Mags20, Mags21, Mags22, Mags23, Mags24, Mags25, Mags26, Mags27 and Mags28. Beach material is characterized by alternations between slightly gravelly sand (g)S, gravelly sand (gS) , sandy gravel (sG) and sand (S).  
 (b) Cross section MagA3 is represented by the samples Maga22, Maga23, Maga24, Maga25, Maga26, Maga27, Maga28, Maga29, and Maga30. Beach material is characterized by alternations between slightly gravelly sand (g)S, sandy gravel (sG) and sand (S). The berm zone appears in both study periods.
